# Supplementary material
Source: PubMed Central journal article supplement (PMC2922555)
Supplement: 1003462107_pnas.201003462SI.pdf [file 1003462107_pnas.201003462SI.pdf]

# Supporting Information

Kitadate and Kobayashi 10.1073/pnas.1003462107

## SI Materials and Methods

**Fly Stocks and Genetics.** *Oregon-R* was used as a wild-type strain. The following mutants and transgenic lines were used: *Notch*<sup>264-39</sup> (1) (a gift from S. Hayashi, RIKEN, Kobe, Japan), *Notch*<sup>5419</sup> (a gift from K. Matsuno, Tokyo University of Science, Noda, Japan), *Ser*<sup>RX106</sup> (2) (a gift from K. Matsuno), *Ser*<sup>CS94</sup> (3) (a gift from K. Matsuno), *Dl*<sup>6B</sup> (Bloomington Stock Center, Indiana University, Bloomington, IN), *Dl*<sup>B2</sup> (Bloomington Stock Center), *Abd-B*<sup>M5</sup> (4, 5) [*Drosophila* Genetic Resource Center, Kyoto, Japan (DGRC)], *neur*<sup>1</sup>, *Egfr*<sup>tsla</sup>, *Egfr*<sup>f24</sup>, *spi*<sup>1</sup> (Bloomington Stock Center), *stet*<sup>871</sup> (6) (a gift from Y. Niki, Ibaraki University, Mito, Japan), *Df(3L)PX62* (6) (a gift from Y. Niki), *Star*<sup>JIN</sup> (Bloomington Stock Center), *gcl*<sup>rev390</sup> *cmp44E rescue#49* (7) (a gift from T.A. Jongens, University of Pennsylvania School of Medicine, Philadelphia, PA), *UAS-Notch*<sup>CD</sup> (8) (a gift from S. Hayashi), *UAS-Star* (Bloomington Stock Center), *UAS-Egfr*<sup>CA</sup> (9) (a gift from L. Tsuda, National Institute for Longevity Sciences, Aichi, Japan), *UAS-2XEGFP* (Bloomington Stock Center), *hsp70-N-GV3* (10) (a gift from G. Struhl, Columbia University College of Physicians and Surgeons, New York, NY), *nanos-GAL4-VP16* (11) (a gift from M. Van Doren, Johns Hopkins University, Baltimore, MD), *twist24B-GAL4* (Bloomington Stock Center), and *twist-GAL4* (Bloomington Stock Center). These alleles were cultured at 25 °C. The genotypes of the mutant lines used in this study are as follows: *Notch*<sup>264-39</sup> *w<sup>ch18A</sup>/FM7c* *P{Gal4-Kr.C}* *P{UAS-GFP.S65T}* *sn*, *Notch*<sup>5419</sup> *FRT18A/FM7c* *P{Gal4-Kr.C}* *P{UAS-GFP.S65T}* *sn*, *Ser*<sup>RX106</sup>/*TM3* *P{Gal4-Kr.C}* *P{UAS-GFP.S65T}*, *ri* *Ser*<sup>CS94</sup>/*TM3* *P{Gal4-Kr.C}* *P{UAS-GFP.S65T}*, *Dl*<sup>B2</sup> *e*<sup>1</sup>/*TM3* *P{Gal4-Kr.C}* *P{UAS-GFP.S65T}* (*Dl*<sup>B2</sup>; an amorphic mutation), *ss*<sup>1</sup> *Dl*<sup>6B</sup> *e*<sup>1</sup>/*TM3* *P{Gal4-Kr.C}* *P{UAS-GFP.S65T}* (*Dl*<sup>6B</sup>; a hypomorphic mutation), *mwh*<sup>1</sup> *ju*<sup>1</sup> *st*<sup>1</sup> *red*<sup>1</sup> *Sb*<sup>sbd-2</sup> *e*<sup>11</sup> *ro*<sup>1</sup> *ca*<sup>1</sup> *Abd-B*<sup>M5</sup>/*TM3* *P{Gal4-Kr.C}* *P{UAS-GFP.S65T}* (*Abd-B*<sup>M5</sup>; a hypomorphic mutation), *Egfr*<sup>tsla</sup>/*CyO* *P{Gal4-Kr.C}* *P{UAS-GFP.S65T}*, *Egfr*<sup>f24</sup>/*CyO* *P{Gal4-Kr.C}* *P{UAS-GFP.S65T}* (*Egfr*<sup>f24</sup>; an amorphic mutation), *Star*<sup>JIN</sup> *cn*<sup>1</sup> *bw*<sup>1</sup> *sp*<sup>1</sup>/*CyO* *P{Gal4-Kr.C}* *P{UAS-GFP.S65T}* (*Star*<sup>JIN</sup>; an amorphic mutation), *spi*<sup>1</sup> *cn*<sup>1</sup> *bw*<sup>1</sup> *sp*<sup>1</sup>/*CyO* *P{Gal4-Kr.C}* *P{UAS-GFP.S65T}* (*spi*<sup>1</sup>; a hypomorphic mutation), *neur*<sup>1</sup>/*TM3* *P{Gal4-Kr.C}* *P{UAS-*

*GFP.S65T}* (*neur*<sup>1</sup>; a hypomorphic mutation), *stet*<sup>871</sup>/*TM3* *P{Gal4-Kr.C}* *P{UAS-GFP.S65T}* (*stet*<sup>871</sup>; a hypomorphic mutation), and *Df(3L)PX62/TM3* *P{Gal4-Kr.C}* *P{UAS-GFP.S65T}*. The genotypes of embryos were determined by using the GFP-expressing balancer chromosomes.

*Egfr*<sup>ts</sup> is an allelic combination of *Egfr*<sup>tsla</sup> and *Egfr*<sup>f24</sup>. *Egfr*<sup>tsla</sup>/*CyO* *P{Gal4-Kr.C}* *P{UAS-GFP.S65T}* virgins were crossed with *Egfr*<sup>f24</sup>/*CyO* *P{Gal4-Kr.C}* *P{UAS-GFP.S65T}* males at 18 °C, and the embryos at 14–20 h after egg laying (AEL) were collected. They were then incubated at 29 °C in a humidified chamber for 7 h.

To detect Notch activation, we used *yw hs-flp; hsp70-N-GV3/UAS-2XEGFP* flies (10). The embryos were heat-shocked at 6.5–9.5 h AEL at 37 °C twice for 30 min, with an intervening 1 h interval at 25 °C, and were allowed to develop to stage 14–17 at 25 °C.

Staging of embryos was conducted as previously described (12).

**In Situ Hybridization.** In situ hybridization was performed as previously described (13). DIG-labeled antisense RNA probes were synthesized from PCR products amplified from pGEM-T Easy Vector (Promega) containing cDNA fragments with T7 and SP6 primers. The cDNA fragments were amplified from an embryonic cDNA library (14) by using the following primers:

*Ser*: 5'-TTTAGTCGAGCGCCGTGCTTCGAGCGG-3' and 5'-CTAAACCATCACAGTGGTGGCAAGGAC-3';

*neur*: 5'-CCCTCTTCATGTCCTGGCCCCAACAAAC-3' and 5'-CCATTTTCCATATTTCAITCAAGCTGTTGG-3';

*kek1*: 5'-GCCAGTGTGTGCAATGGCAATGGGC-3' and 5'-GACCGTGAAGTCCGCCCCCGCCACTG-3';

*spi*: 5'-CTCAACGTTTACGTTCCACCAGCAGC-3' and 5'-GGCGCGTGTGTCGCGTTGTGTGTGTG-3';

*stet*: 5'-GGCCGGACAAGTGCATCCGTCGGCAGT-3' and 5'-GATGCTAGTGCCAGGCTTCCCGCC-3'; and

*Star*: 5'-CGCGGACTACGAGCTGAATGGGGTTGCGC-3' and 5'-ATGTGCATGAGTGTAGTGTGAGTG-3'.

Triple staining for *kek1* RNA, the germ-line marker *Vasa* (*Vas*), and GFP was performed as previously described (15).

- Dietrich U, Campos-Ortega JA (1984) The expression of neurogenic loci in imaginal epidermal cells of *Drosophila melanogaster*. *J Neurogenet* 1:315–332.
- Speicher SA, Thomas U, Hinz U, Knust E (1994) The Serrate locus of *Drosophila* and its role in morphogenesis of the wing imaginal discs: Control of cell proliferation. *Development* 120:535–544.
- Couso JP, Knust E, Martinez Arias A (1995) Serrate and wingless cooperate to induce vestigial gene expression and wing formation in *Drosophila*. *Curr Biol* 5:1437–1448.
- Delorenzi M, Bienz M (1990) Expression of *Abdominal-B* homeoproteins in *Drosophila* embryos. *Development* 108:323–329.
- DeFalco T, Le Bras S, Van Doren M (2004) *Abdominal-B* is essential for proper sexually dimorphic development of the *Drosophila* gonad. *Mech Dev* 121:1323–1333.
- Schulz C, Wood CG, Jones DL, Tazuke SI, Fuller MT (2002) Signaling from germ cells mediated by the rhomboid homolog *stet* organizes encapsulation by somatic support cells. *Development* 129:4523–4534.
- Robertson SE, Dockendorff TC, Leatherman JL, Faulkner DL, Jongens TA (1999) germ cell-less is required only during the establishment of the germ cell lineage of *Drosophila* and has activities which are dependent and independent of its localization to the nuclear envelope. *Dev Biol* 215:288–297.
- Doherty D, Feger G, Younger-Shepherd S, Jan LY, Jan YN (1996) Delta is a ventral to dorsal signal complementary to Serrate, another Notch ligand, in *Drosophila* wing formation. *Genes Dev* 10:421–434.
- Queenan AM, Ghabrial A, Schüpbach T (1997) Ectopic activation of *torpedo/Egfr*, a *Drosophila* receptor tyrosine kinase, dorsalizes both the eggshell and the embryo. *Development* 124:3871–3880.
- Struhl G, Adachi A (1998) Nuclear access and action of Notch in vivo. *Cell* 93:649–660.
- Van Doren M, Williamson AL, Lehmann R (1998) Regulation of zygotic gene expression in *Drosophila* primordial germ cells. *Curr Biol* 8:243–246.
- Campos-Ortega JA, Hartenstein V (1997) *The Embryonic Development of Drosophila melanogaster*, 2nd Ed (Springer, Heidelberg).
- Mukai M, Kitadate Y, Arita K, Shigenobu S, Kobayashi S (2006) Expression of meiotic genes in the germline progenitors of *Drosophila* embryos. *Gene Expr Patterns* 6:256–266.
- Brown NH, Kafatos FC (1988) Functional cDNA libraries from *Drosophila* embryos. *J Mol Biol* 203:425–437.
- Kitadate Y, Shigenobu S, Arita K, Kobayashi S (2007) Boss/Sev signaling from germline to soma restricts germline-stem-cell-niche formation in the anterior region of *Drosophila* male gonads. *Dev Cell* 13:151–159.
